# Supplementary material for: Identification of tumour suppressive microRNA-451a in hypopharyngeal squamous cell carcinoma based on microRNA expression signature
Source: PubMed Central journal article supplement — Br J Cancer. 2014 Jun 10;111(2):386–94. doi: 10.1038/bjc.2014.293 (PMC4102946; doi:10.1038/bjc.2014.293), 2014-06-10
Supplement: bjc2014293x2.pdf [file bjc2014293x2.pdf]

## Supplemental Figure 1

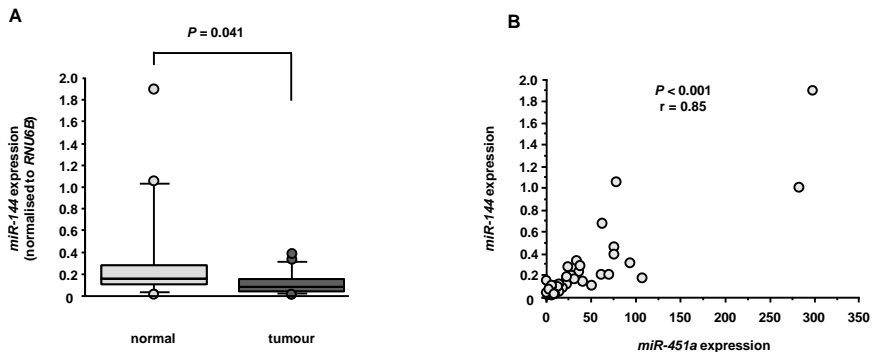

**Supplemental Figure 1.** (A) Expression levels of *miR-144* in HSCC clinical specimens. (B) Correlation between the relative expression levels of *miR-451a* (x-axis) and that of *miR-144* (y-axis). Levels are plotted as a scatterplot.

## Supplemental Figure 2

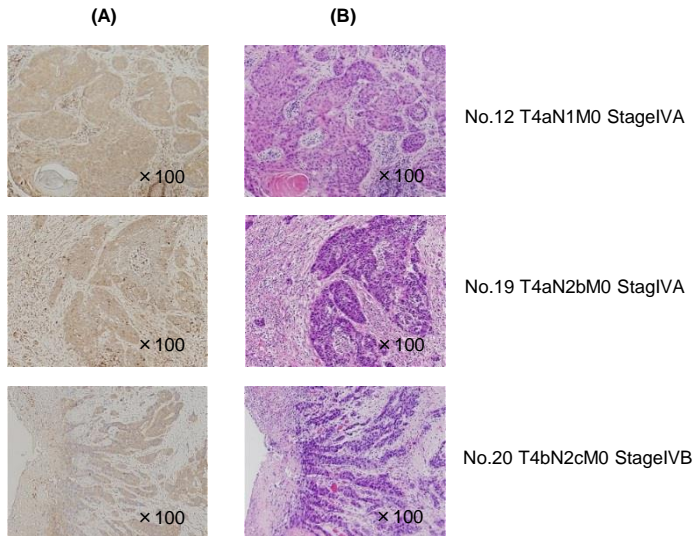

**Supplemental Figure 2.** Immunohistochemistry of ESDN/DCBLD2 in clinical HSCC specimens.(A)Typical Immunohistochemical staining of ESDN/DCBLD2 (B)Hematoxylin and Eosin staining of the tumour tissues.

## Supplemental Figure 3

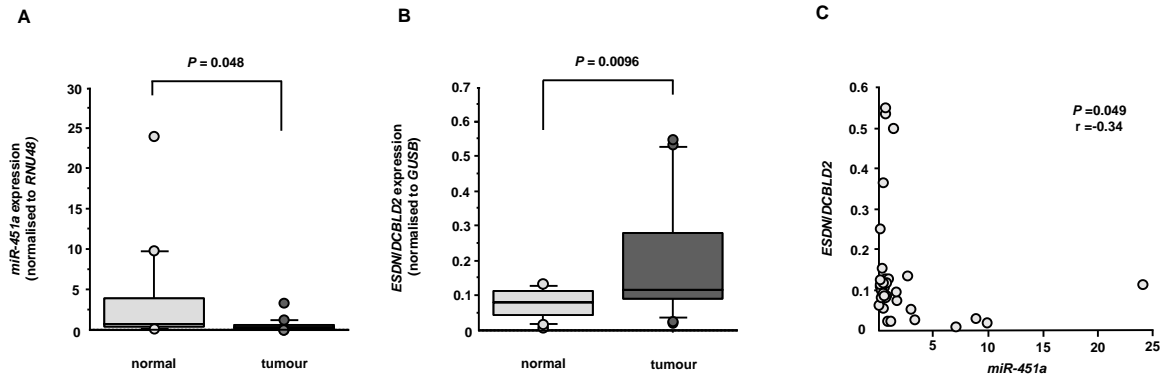

**Supplemental Figure 3.** (A),(B) Expression levels of *miR-451a*(A) and *ESDN/DCBLD2*(B) in HNSCC clinical specimens. (C) Correlation between the relative expression levels of *miR-451a* (x-axis) and that of *ESDN/DCBLD2* (y-axis). Levels are plotted as a scatterplot.

## Supplemental Figure 4

Clinical features of 17 patients with HNSCC in Supplemental Figure 3

| No | Location   | Age | Sex    | T  | N  | M | Stage | Differentiaion |
|----|------------|-----|--------|----|----|---|-------|----------------|
| 1  | Tongue     | 68  | Male   | 2  | 0  | 0 | II    | well           |
| 2  | Tongue     | 66  | Male   | 2  | 1  | 0 | III   | moderate       |
| 3  | Tongue     | 76  | Female | 1  | 0  | 0 | I     | well           |
| 4  | Tongue     | 69  | Male   | 1  | 0  | 0 | I     | well           |
| 5  | Tongue     | 76  | Female | 1  | 0  | 0 | I     | well           |
| 6  | Tongue     | 67  | Male   | 4a | 2c | 0 | IVA   | moderate       |
| 7  | Tongue     | 36  | Female | 3  | 1  | 0 | III   | moderate       |
| 8  | Tongue     | 64  | Male   | 1  | 0  | 0 | I     | well           |
| 9  | Oropharynx | 67  | Male   | 3  | 2c | 0 | IVA   | poor           |
| 10 | Oropharynx | 52  | Male   | 3  | 2a | 0 | IVA   | moderate       |
| 11 | Oropharynx | 76  | Male   | 2  | 0  | 0 | II    | poor           |
| 12 | Oropharynx | 55  | Male   | 4a | 2c | 0 | IVA   | moderate       |
| 13 | Oropharynx | 74  | Male   | 2  | 0  | 0 | II    | well           |
| 14 | Larynx     | 63  | Male   | 3  | 0  | 0 | III   | moderate       |
| 15 | Larynx     | 69  | Male   | 3  | 0  | 0 | III   | well           |
| 16 | Larynx     | 59  | Male   | 4a | 0  | 0 | IVA   | well           |
| 17 | Larynx     | 66  | Male   | 4a | 0  | 0 | IVA   | moderate       |

HNSCC: head and neck squamous cell carcinoma
